# Supplementary material
Source: PubMed Central journal article supplement (PMC3095913)
Supplement: NIHMS35274-supplement-01.pdf [file NIHMS35274-supplement-01.pdf]

## Supplemental Materials

Supplemental Figure S1. Regional plot of *F3*

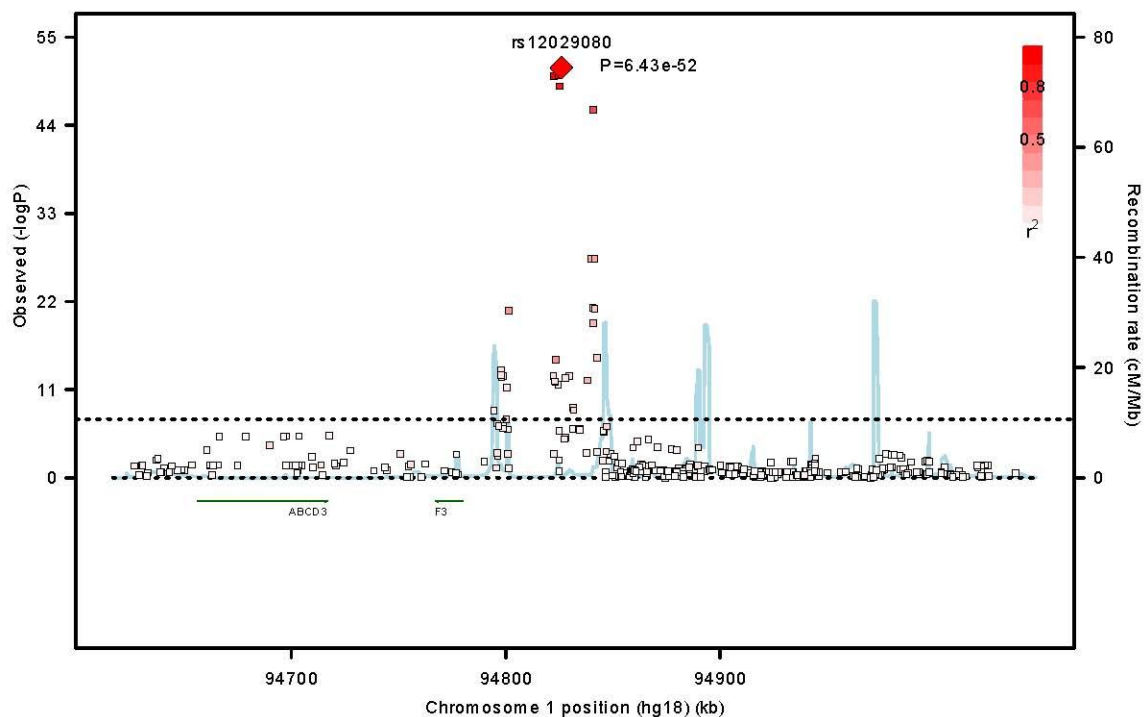

Supplemental Figure S2. Forest plot of rs12029080

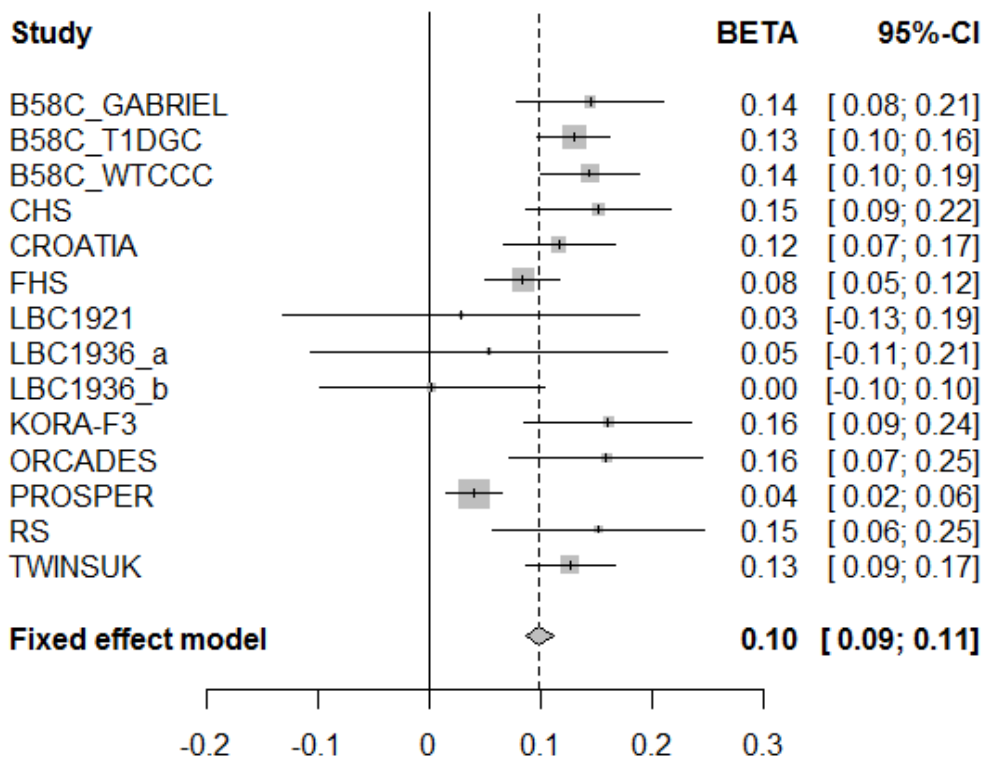

Supplemental Figure S3. Regional plot of *F5*

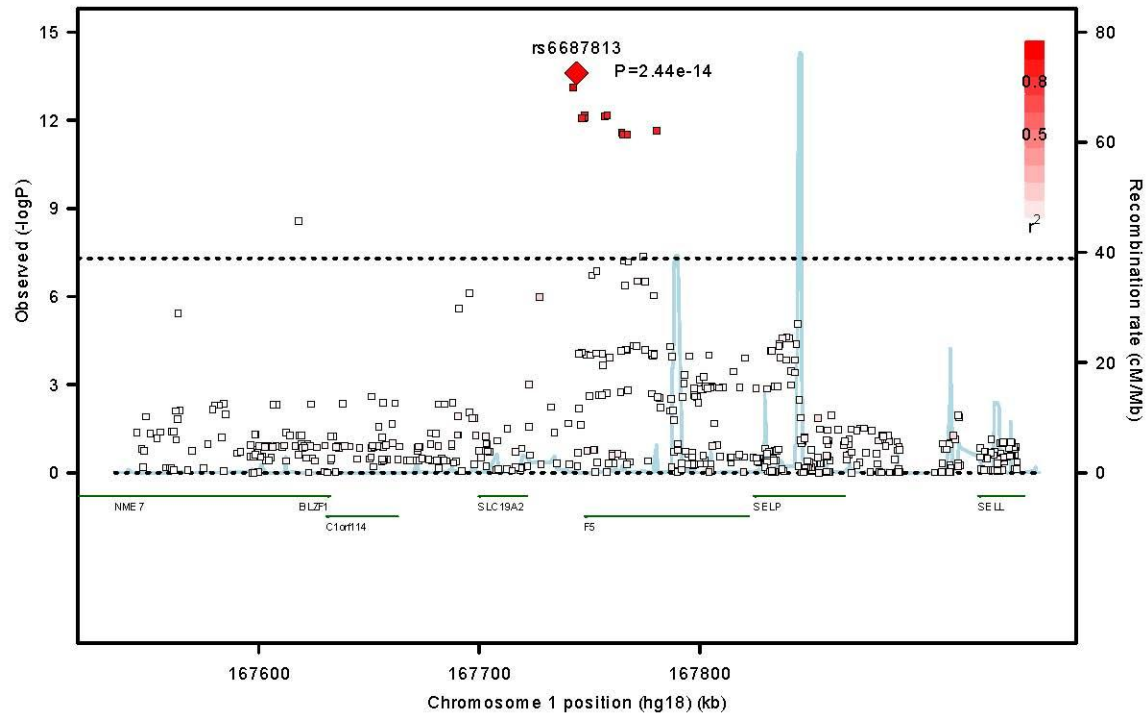

Supplemental Figure S4. Forest plot of rs6687813

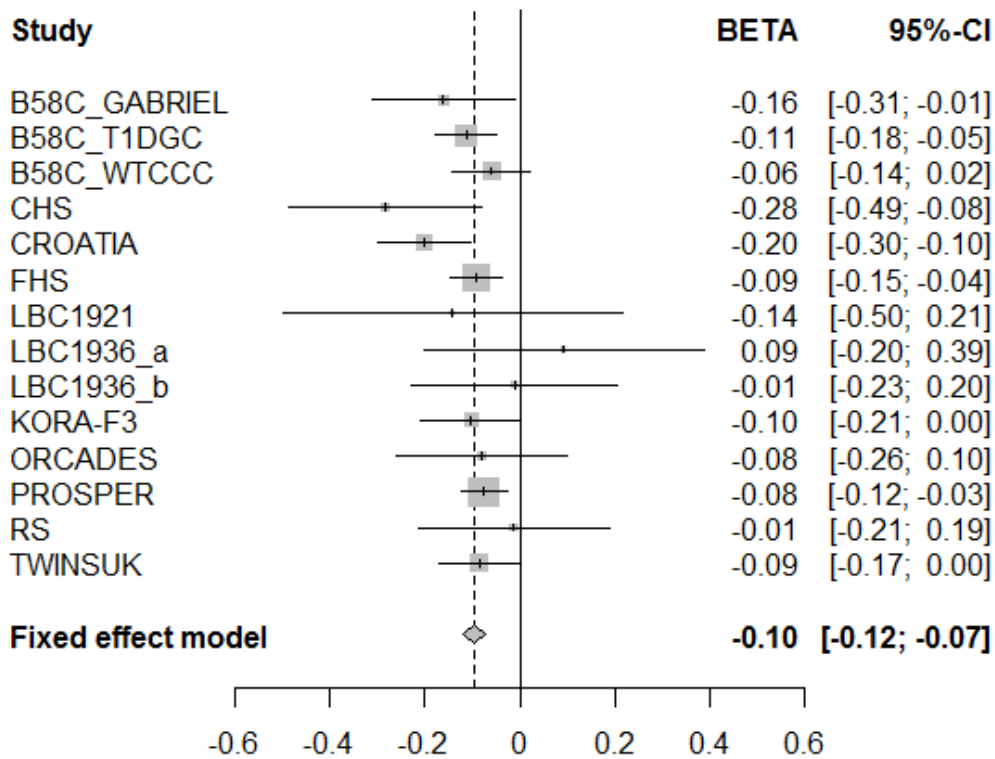

Supplemental Figure S5. Forest plot of rs6025

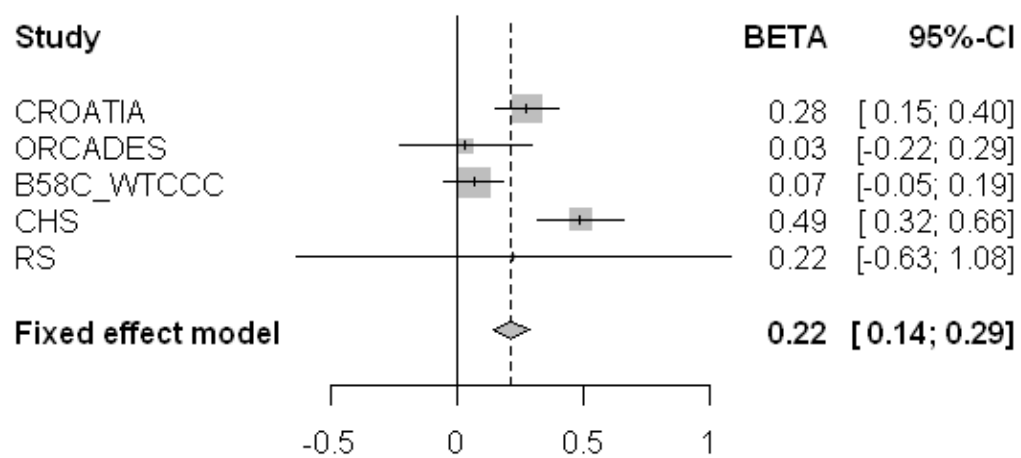

Supplemental Figure S6. Regional plot of *FGA*

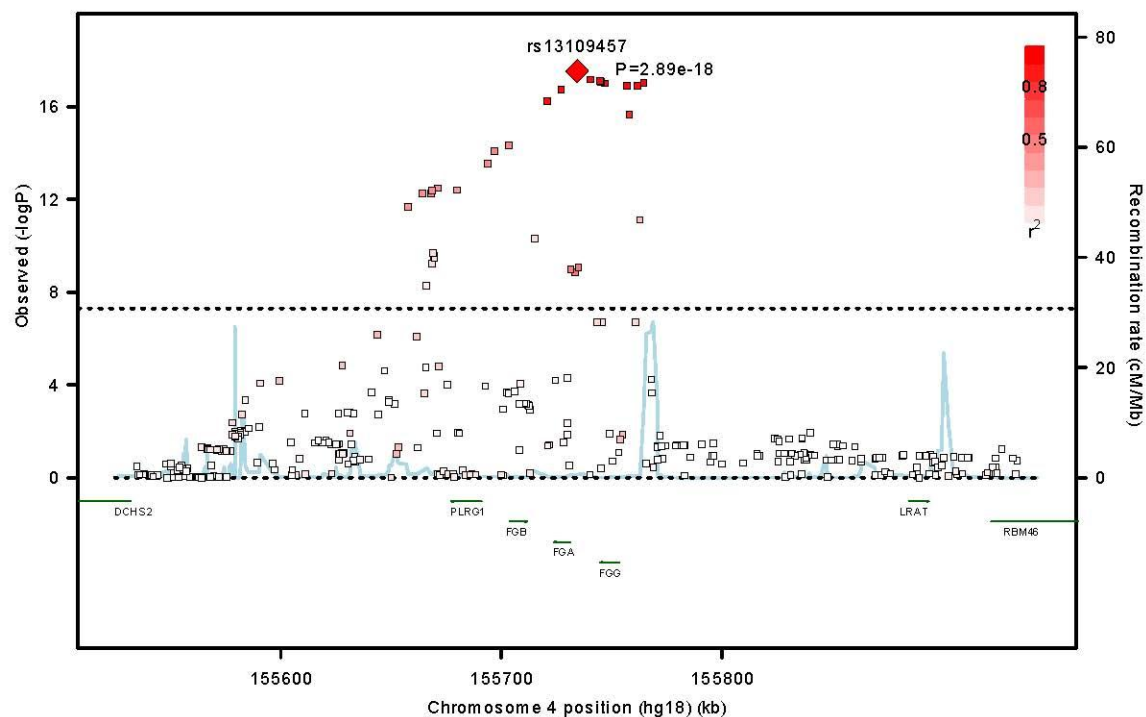

Supplemental Figure S7. Forest plot of rs13109457

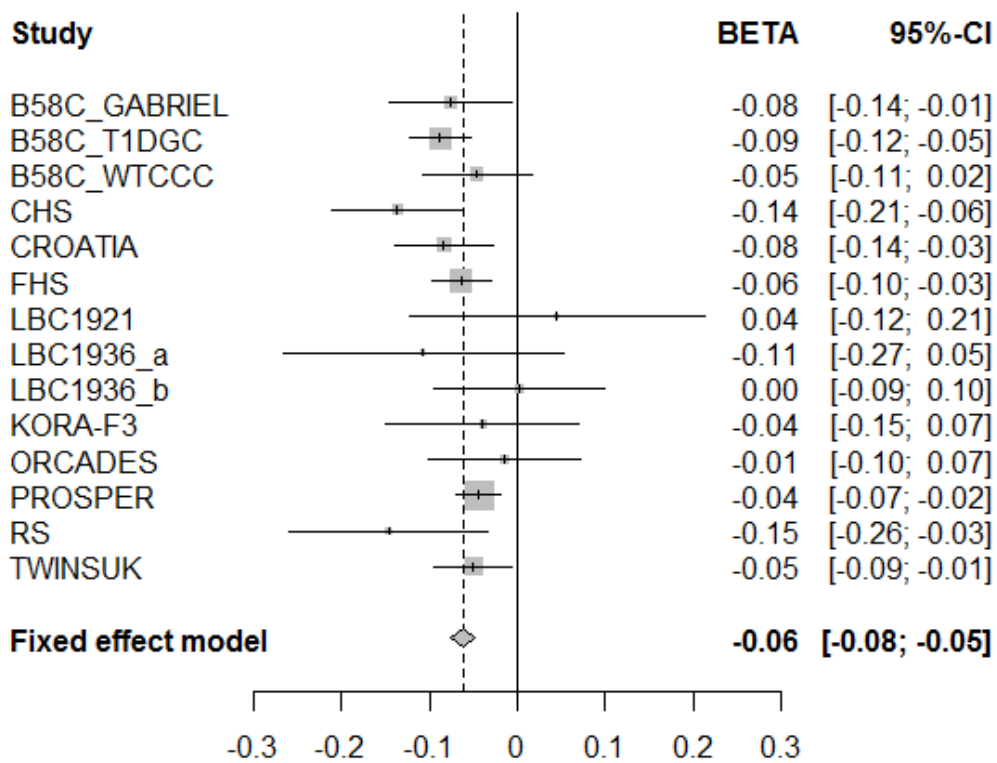

Supplement Figure S7. Depiction of major components of the coagulation cascade.

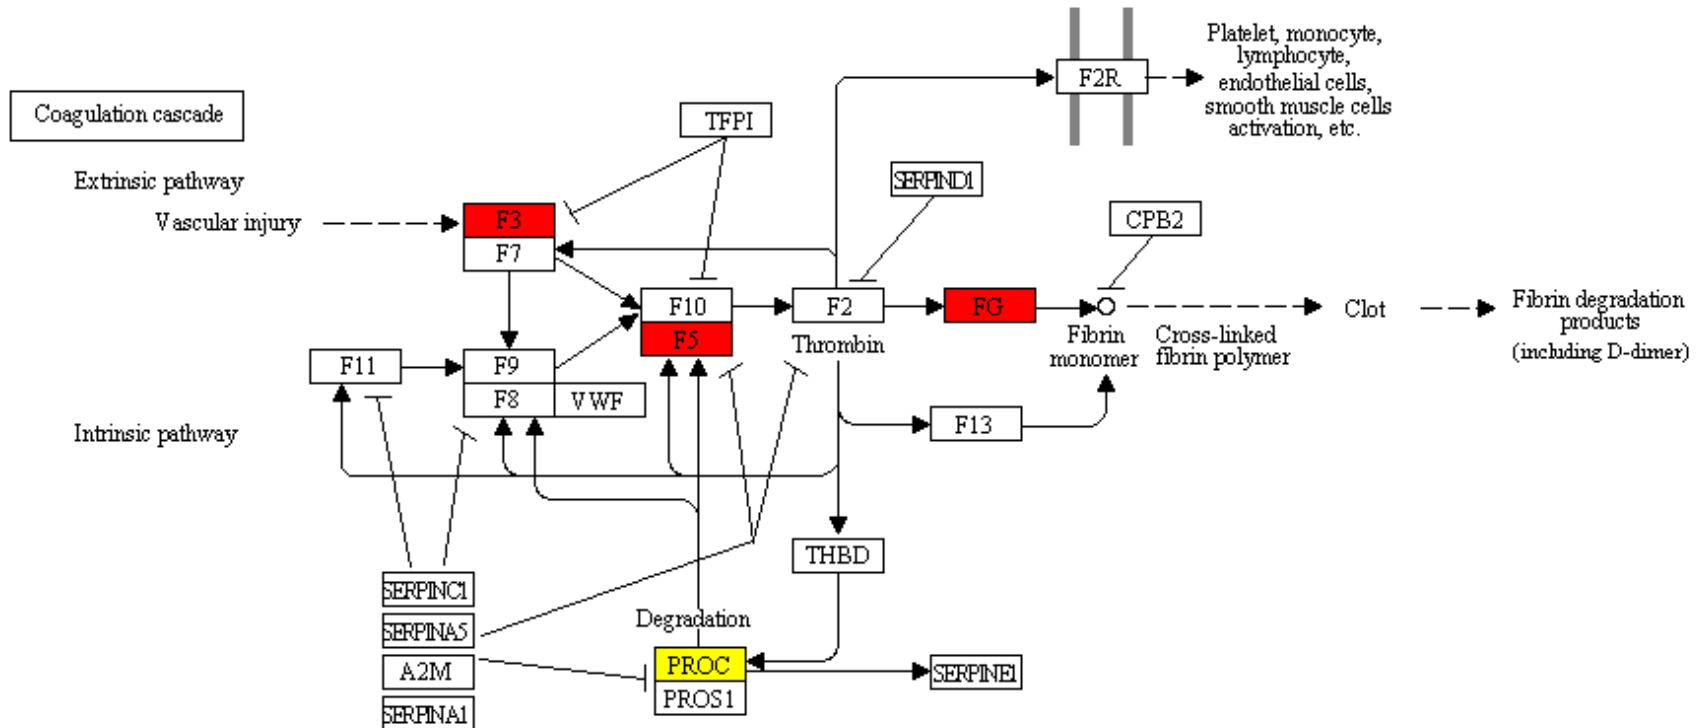

From Kyoto Encyclopedia of Genes and Genomes ([http://www.genome.jp/kegg-bin/show\\_pathway?map04610](http://www.genome.jp/kegg-bin/show_pathway?map04610))

A2M = alpha-2-macroglobulin; CPB2 = plasma carboxypeptidase B2 (thrombin-activatable fibrinolysis inhibitor); F2 = coagulation factor II (prothrombin); F2R = coagulation factor 2 receptor; F3 = coagulation factor III (tissue factor); F5 = coagulation factor V; F7 = coagulation factor VII; F8 = coagulation factor VIII; F9 = coagulation factor IX; F10 = coagulation factor X; F11 = coagulation factor XI; F13 = coagulation factor XIII; FG (includes FGA, FGB, FGG) = alpha, beta, and gamma fibrinogen; PROC = protein C; PROS1 = protein S; SERPINA1 = alpha-1-antitrypsin; SERPINA5 = protein C inhibitor; SERPINC1 = antithrombin; SERPIND1 = heparin cofactor II; SERPINE1 = plasminogen activator inhibitor-1; TFPI = tissue-factor pathway inhibitor; THBD = thrombomodulin; VWF = von Willebrand factor.

Supplemental Table S1: Genotyping and imputation methods for autosomal chromosomes by study

| Methods                          | B58C-WTCCC  | B58C-T1DGC       | B58C-GABRIEL          | CHS                   | Croatia-Vis           | FHS                                                    |
|----------------------------------|-------------|------------------|-----------------------|-----------------------|-----------------------|--------------------------------------------------------|
| Platform                         | Affymetrix  | Illumina         | Illumina              | Illumina              | Illumina              | Affymetrix                                             |
| Chip                             | 500K        | 550K             | 610K                  | 370 CNV               | 300v1                 | 500K + 50K                                             |
| SNPs investigated                | 490,032     | 539,438          | 582,892               | 306,655               | 317,500               | 490,700 (500K)<br>48,195 (50K)                         |
| SNP exclusion criteria*          | Sample-wise | Call rates <0.98 | excluded              |                       |                       |                                                        |
| Call rate                        | none        | none             | none                  | r0.97                 | r0.98                 | r0.97                                                  |
| HWE p-value                      | None        | None             | None                  | <1.0x10 <sup>-5</sup> | <1.0x10 <sup>-6</sup> | <1 x 10E-6                                             |
| Variants included for imputation | 490,032     | 539,438          | 582,892               | 291,322               | 299,829               | 343,361 (500K)<br>34,841 (50K)                         |
| Percent of variants included     | 100%        | 100%             | 100%                  | 95%                   | 94.5%                 | 70% (500k)<br>72% (50K)                                |
| Imputation software              | IMPUTE      | MACH             | MACH                  | BIMBAM                | MACH                  | MACH                                                   |
| Imputation software version      | 0.1.3       | 1.0.13           | 1.0.16                | 0.99                  | 1.0.16                | 1.0.15                                                 |
| Genome build                     | 35          | 35               | 36                    | 36                    | 36                    | 36.2                                                   |
| Total number of SNPs             | 2,236,936   | 2,557,252        | 2,543,887             | 2,543,887             | 2,453,887             | 2,543,887                                              |
| Methods                          | KORA-F3     | LBC (all)        | ORCADES               | PROSPER               | RS                    | Twins UK                                               |
| Platform                         | Affymetrix  | Illumina         | Illumina              | Illumina              | Illumina              | Illumina                                               |
| Chip                             | 500K        | 610-Quad v1      | 300 v2                | 660K                  | 550 v3                | 300, 610Q, 1M, 1M-Duo, 1.2MDuo                         |
| SNPs I                           | 490,032     | 542,050          | 373397                | 561.490               | 561,466               | 307,739 (300)<br>598,207 (610Q)<br>892,943 (1M)        |
| SNP E                            |             |                  |                       |                       |                       |                                                        |
| Call                             | 1.00        | r0.98            | r0.98                 | r0.95                 | r0.98                 | r0.97 (MAF <sup>-</sup> 0.05)<br>r0.99 (0.01rMAFr0.05) |
| HWE                              | -           | <0.001           | <1.0x10 <sup>-6</sup> | <1.0x10 <sup>-6</sup> | <1.0x10 <sup>-6</sup> | <1.0x10 <sup>-6</sup>                                  |
| Variants                         | 490,032     | 535,709          | 293,700               | 557,192               | 512,349               | 889,685 (Merged)                                       |
| Percent                          | 100%        | 99%              | 92%                   | 99.2%                 | 91.3%                 | 99.6% (1M)                                             |
| Software                         | MACH        | MACH             | MACH                  | MACH                  | MACH                  | Impute                                                 |
| Version                          | 1.0.9       | 1.0.16           | 1.0.16                | 1.0.15                | 1.0.15                | 2                                                      |
| Build                            | 35.21       | 36               | 36                    | 36                    | 36                    | 36                                                     |
| Total SNPs                       | 2,557,252   | 2,543,887        | 2,453,887             | 2,543,887             | 2,543,887             | 2,657,661                                              |

Supplemental Table S2. Description of subthreshold single-nucleotide-polymorphism marker associations with p-values less than  $1.0 \times 10^{-5}$  but more than  $5.0 \times 10^{-8}$

| Chromosome | SNP            |                  | Position  | Variant | MAF   | P-value              | Parameter coefficient* | Closest Gene (location/distance)                 |
|------------|----------------|------------------|-----------|---------|-------|----------------------|------------------------|--------------------------------------------------|
|            | Number of SNPs | Most significant |           |         |       |                      |                        |                                                  |
| 1          | 4              | rs2774920        | 94383888  | G       | 0.085 | $1.1 \times 10^{-6}$ | 0.0513                 | <i>ABCA4</i> (25kb 5q; <i>ARHGAP29</i> (23kb 3q) |
| 1          | 2              | rs16861990       | 167401751 | C       | 0.061 | $1.9 \times 10^{-6}$ | 0.0614                 | <i>NME7</i> (intronic)                           |
| 5          | 1              | rs16871023       | 73250993  | G       | 0.046 | $1.4 \times 10^{-6}$ | -0.0761                | <i>RGNEF</i> (intronic)                          |
| 9          | 6              | rs4246856        | 24082072  | C       | 0.201 | $6.2 \times 10^{-6}$ | 0.0333                 | **                                               |
| 9          | 6              | rs687621         | 135126886 | G       | 0.317 | $7.0 \times 10^{-6}$ | 0.0284                 | <i>ABO</i> (intronic)                            |
| 11         | 1              | rs2306029        | 46849684  | C       | 0.448 | $7.8 \times 10^{-6}$ | -0.0269                | <i>LRP4</i> (exonic: Ser1554Gly)                 |
| 11         | 1              | rs7117404        | 47083729  | G       | 0.153 | $8.5 \times 10^{-6}$ | -0.0398                | <i>C11orf49</i> (intronic)                       |
| 11         | 1              | rs11039571       | 48163835  | G       | 0.131 | $9.4 \times 10^{-6}$ | -0.0390                | <i>PTPRJ</i> (15kb 3q)                           |
| 11         | 5              | rs1351696        | 48339047  | G       | 0.135 | $7.9 \times 10^{-6}$ | -0.0382                | <i>OR4C45</i> (9kb 5q)                           |
| 12         | 1              | rs7314285        | 110006409 | G       | 0.065 | $9.5 \times 10^{-6}$ | 0.0542                 | <i>CUX2</i> (intronic)                           |
| 16         | 4              | rs1991867        | 81076729  | C       | 0.111 | $3.5 \times 10^{-6}$ | -0.0440                | <i>CDH13</i> (141kb 5q)                          |
| 18         | 34             | rs8083346        | 61149755  | G       | 0.346 | $6.2 \times 10^{-6}$ | -0.0278                | **                                               |
| 20         | 6              | rs867186         | 33228215  | G       | 0.091 | $3.7 \times 10^{-6}$ | 0.0484                 | <i>PROCR</i> (exonic: Ser219Gly)                 |

CI = confidence interval based on a 2-sided  $\alpha = 0.00000005$ ; MAF = weighted minor allele frequency; SNP = single nucleotide polymorphism.

\*Parameter coefficient represents change (% of activity or antigen) associated with 1-unit change in allele dosage. \*\* No genes within 200kb on either side of SNP.
